# Supplementary material for: New topology of CN-bridged clusters: dodecanuclear face-sharing defective cubes based on octacyanometallates(iv) and nickel(ii) with diimine ligands
Source: Royal Society of Chemistry journal article supplement (doi:10.1039/c5dt01789k), 2015-01-01
Supplement: c5dt01789k1.pdf [file c5dt01789k1.pdf]

## Supplementary information for

### New topology of CN-bridged clusters: dodecanuclear face-sharing defective cubes based on octacyanomethylates(IV) and nickel(II) with diimine ligands

Beata Nowicka,<sup>\*a</sup> Christian Näther,<sup>b</sup> Alexandra Halemba,<sup>a</sup> Mateusz Reczyński,<sup>a</sup> and Barbara Sieklucka<sup>a</sup>

<sup>a</sup>*Faculty of Chemistry, Jagiellonian University, Ingardena 3, 30-060 Kraków, Poland*

<sup>b</sup>*Institut für Anorganische Chemie, Christian-Albrechts-Universität, Max-Eyth.-Str. 2, 24118 Kiel, Germany*

#### Additional elemental analysis results for compound 2

Sample in form of crystals analysed within 2 days after removal from solution.

Found: C, 34.90; H, 3.64; N, 16.84; calc. for C<sub>116</sub>H<sub>140</sub>N<sub>48</sub>O<sub>34</sub>Ni<sub>8</sub>W<sub>4</sub>: C, 35.22; H, 3.57; N, 17.00

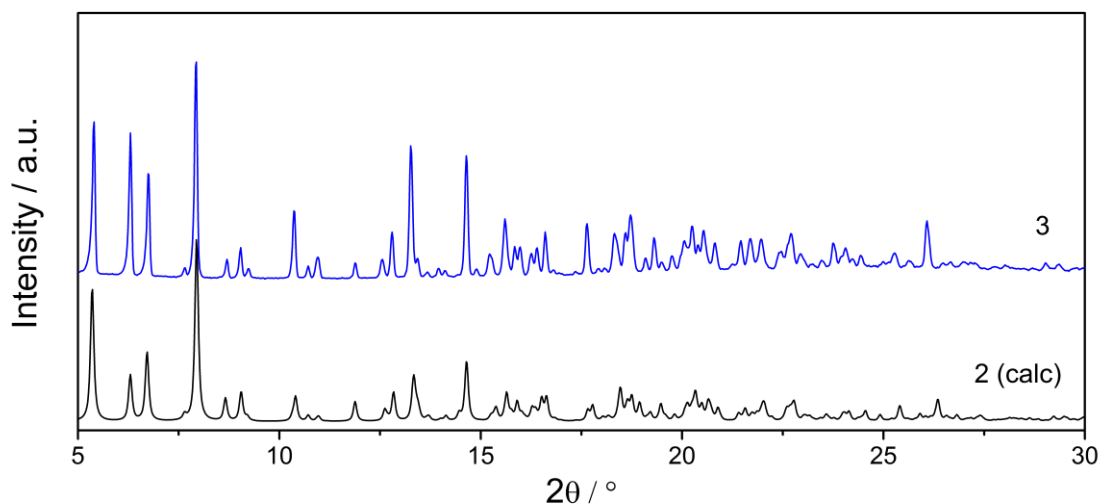

**Figure S1.** Powder X-ray diffraction pattern for **3** (blue line) in comparison to the pattern calculated for **2** (black line).

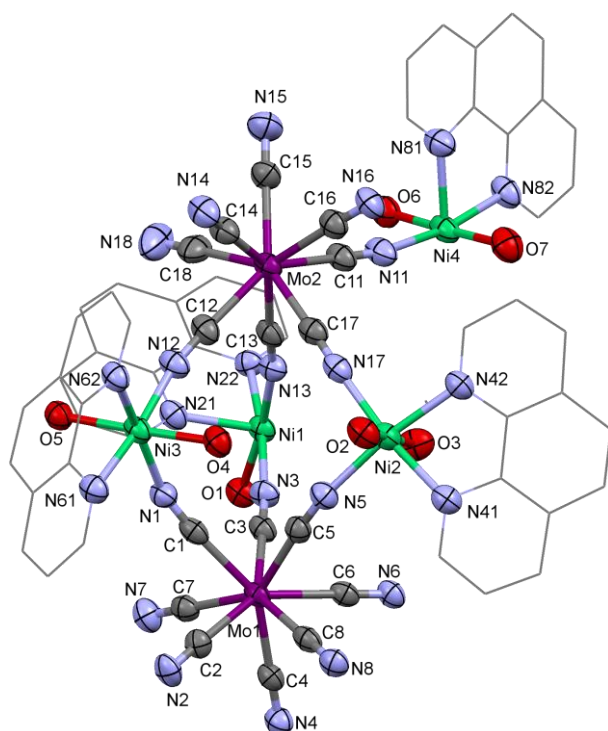

**Figure S2.** Asymmetric unit of **1** with selected atoms numbering. Thermal ellipsoids at 40% probability. Hydrogen atoms and crystallisation solvent omitted for clarity; phen ligands depicted as sticks.

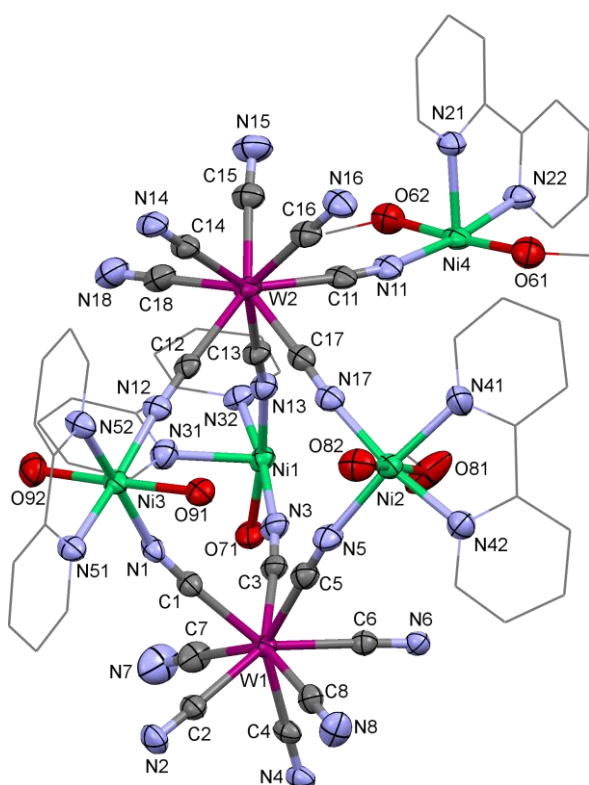

**Figure S3.** Asymmetric unit of **2** with selected atoms numbering. Thermal ellipsoids at 40% probability. Hydrogen atoms and crystallisation solvent omitted for clarity; bpy ligands depicted as sticks.

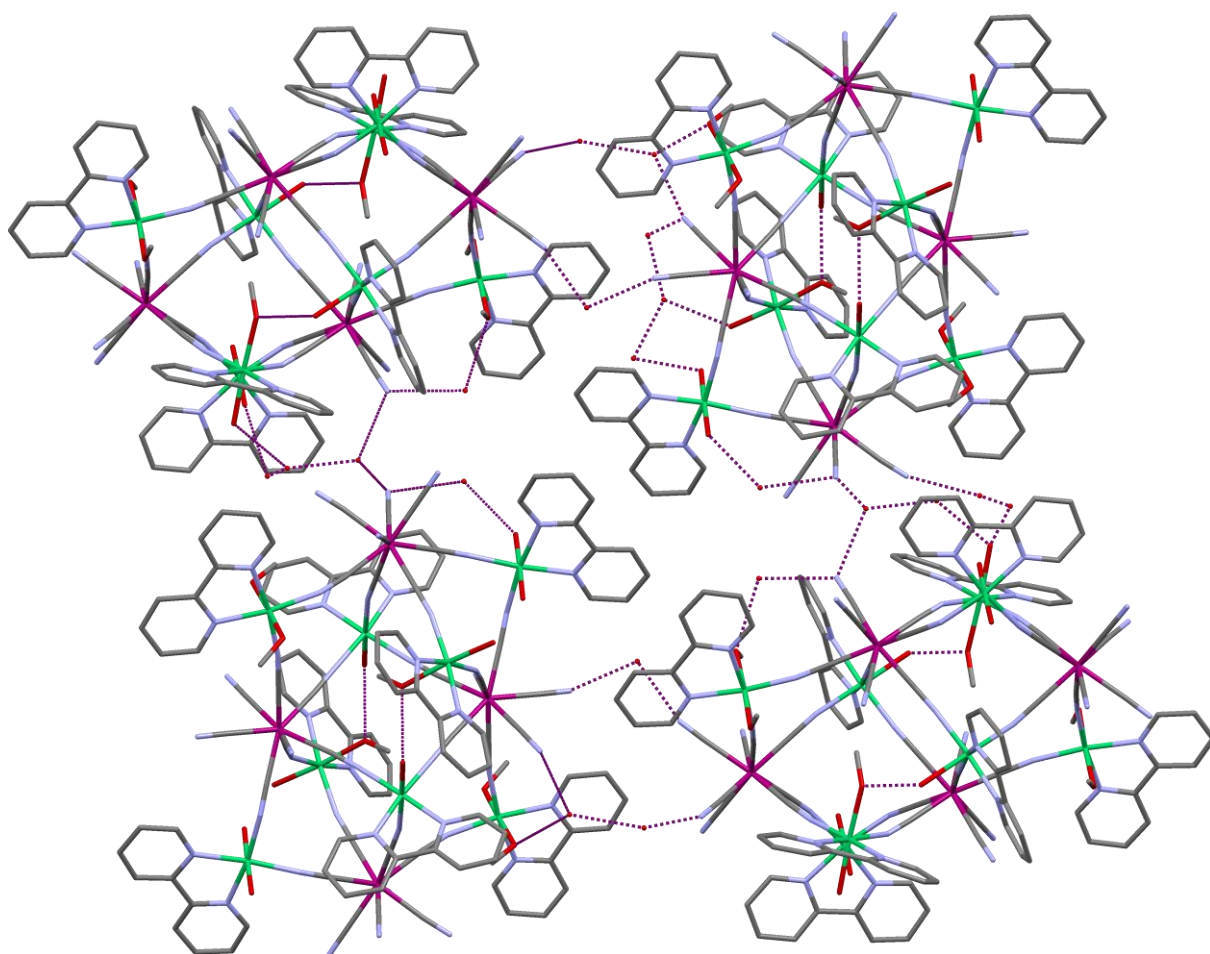

**Figure S4.** Hydrogen bonds in the structure of **2**.

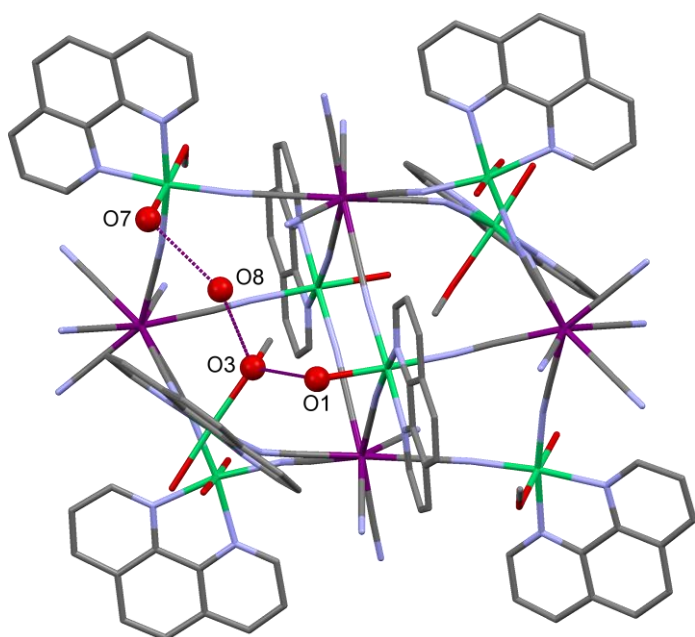

**Figure S4.** Hydrogen bonds in the structure of **1**.

**Table S1.** Selected bond angles (°) in the structures of **1** and **2**.

| Angles of bridging CN ligands     |            |          |            |            |          |
|-----------------------------------|------------|----------|------------|------------|----------|
|                                   | <b>1</b>   | <b>2</b> |            | <b>1</b>   | <b>2</b> |
| Ni1-N3-C3                         | 175.0(5)   | 170.7(8) | M1-C1-N1   | 175.0(4)   | 175.4(6) |
| Ni1-N6-C6                         | 174.6(4)   | 178.9(7) | M1-C3-N3   | 178.8(5)   | 174.9(8) |
| Ni1-N13-C13                       | 169.1(5)   | 167.3(7) | M1-C4-N4   | 179.4(5)   | 178.9(8) |
| Ni2-N5-C5                         | 159.7(4)   | 157.6(7) | M1-C5-N5   | 175.2(5)   | 176.9(7) |
| Ni2-N17-C17                       | 166.5(5)   | 169.1(6) | M1-C6-N6   | 176.9(5)   | 176.6(7) |
| Ni3-N1-C1                         | 153.4(5)   | 156.9(6) | M2-C11-N11 | 178.2(5)   | 174.8(8) |
| Ni3-N12-C12                       | 164.6(5)   | 168.2(7) | M2-C12-N12 | 175.7(6)   | 177.3(8) |
| Ni4-N4-C4                         | 175.5(5)   | 171.2(6) | M2-C13-N13 | 176.6(4)   | 177.3(8) |
| Ni4-N11-C11                       | 169.7(6)   | 164.8(8) | M2-C17-N17 | 178.4(5)   | 176.2(7) |
| Angles at M <sup>IV</sup> centres |            |          |            |            |          |
|                                   | <b>1</b>   | <b>2</b> |            | <b>1</b>   | <b>2</b> |
| C1-M1-C2                          | 76.16(19)  | 74.4(3)  | C11-M2-C12 | 140.8(2)   | 136.6(3) |
| C1-M1-C3                          | 76.19(19)  | 78.5(3)  | C11-M2-C13 | 68.85(19)  | 70.2(3)  |
| C1-M1-C4                          | 145.75(19) | 145.9(3) | C11-M2-C14 | 144.5(2)   | 142.4(3) |
| C1-M1-C5                          | 70.5(2)    | 71.7(3)  | C11-M2-C15 | 77.3(2)    | 73.4(3)  |
| C1-M1-C6                          | 136.85(18) | 140.1(3) | C11-M2-C16 | 74.1(2)    | 72.0(3)  |
| C1-M1-C7                          | 75.7(2)    | 77.9(3)  | C11-M2-C17 | 87.9(2)    | 78.1(3)  |
| C1-M1-C8                          | 119.3(2)   | 114.8(3) | C11-M2-C18 | 105.3(3)   | 123.4(4) |
| C2-M1-C3                          | 144.4(2)   | 141.7(3) | C12-M2-C13 | 74.12(19)  | 78.1(3)  |
| C2-M1-C4                          | 83.6(2)    | 81.5(3)  | C12-M2-C14 | 73.0(2)    | 75.8(3)  |
| C2-M1-C5                          | 109.14(19) | 115.4(3) | C12-M2-C15 | 135.9(2)   | 144.3(3) |
| C2-M1-C6                          | 142.7(2)   | 141.7(3) | C12-M2-C16 | 127.6(2)   | 123.9(3) |
| C2-M1-C7                          | 78.58(19)  | 76.3(4)  | C12-M2-C17 | 72.7(2)    | 69.5(3)  |
| C2-M1-C8                          | 71.81(19)  | 72.8(3)  | C12-M2-C18 | 76.5(3)    | 73.5(3)  |
| C3-M1-C4                          | 107.96(19) | 108.5(3) | C13-M2-C14 | 146.61(18) | 147.0(3) |
| C3-M1-C5                          | 81.97(19)  | 80.0(3)  | C13-M2-C15 | 122.1(2)   | 103.1(3) |
| C3-M1-C6                          | 72.0(2)    | 74.5(3)  | C13-M2-C16 | 133.4(2)   | 139.8(3) |
| C3-M1-C7                          | 73.17(19)  | 71.9(4)  | C13-M2-C17 | 79.1(2)    | 83.6(3)  |
| C3-M1-C8                          | 142.61(19) | 144.5(3) | C13-M2-C18 | 75.1(2)    | 75.4(3)  |
| C4-M1-C5                          | 143.3(2)   | 141.8(3) | C14-M2-C15 | 79.5(2)    | 87.0(3)  |
| C4-M1-C6                          | 73.30(19)  | 71.8(3)  | C14-M2-C16 | 73.9(2)    | 72.7(3)  |
| C4-M1-C7                          | 73.3(2)    | 73.1(3)  | C14-M2-C17 | 96.6(2)    | 105.5(3) |
| C4-M1-C8                          | 78.7(2)    | 79.4(3)  | C14-M2-C18 | 91.5(3)    | 78.0(3)  |
| C5-M1-C6                          | 76.8(2)    | 75.2(3)  | C15-M2-C16 | 73.9(2)    | 78.2(4)  |
| C5-M1-C7                          | 141.9(2)   | 142.0(3) | C15-M2-C17 | 145.5(2)   | 146.1(4) |
| C5-M1-C8                          | 73.4(2)    | 74.3(3)  | C15-M2-C18 | 70.3(3)    | 72.4(4)  |
| C6-M1-C7                          | 120.2(2)   | 119.3(3) | C16-M2-C17 | 72.2(2)    | 75.8(3)  |
| C6-M1-C8                          | 75.20(18)  | 75.6(3)  | C16-M2-C18 | 143.2(2)   | 139.2(3) |
| C7-M1-C8                          | 141.05(19) | 141.1(3) | C17-M2-C18 | 144.1(2)   | 140.4(3) |

| Angles at Ni <sup>II</sup> centres (in rows corresponding angles for <b>1</b> and <b>2</b> ) |           |             |         |
|----------------------------------------------------------------------------------------------|-----------|-------------|---------|
| <b>1</b>                                                                                     |           | <b>2</b>    |         |
| N3 Ni1 N13                                                                                   | 92.70(18) | N3 Ni1 N13  | 93.4(3) |
| N3 Ni1 N6                                                                                    | 94.39(19) | N3 Ni1 N6   | 91.2(3) |
| N13 Ni1 N6                                                                                   | 96.91(19) | N6 Ni1 N13  | 97.3(3) |
| N3 Ni1 N21                                                                                   | 94.31(18) | N3 Ni1 N31  | 95.7(3) |
| N13 Ni1 N21                                                                                  | 86.77(19) | N13 Ni1 N31 | 85.6(3) |
| N13 Ni1 N22                                                                                  | 89.57(18) | N13 Ni1 N32 | 91.6(3) |
| N6 Ni1 N22                                                                                   | 91.40(18) | N6 Ni1 N32  | 94.1(3) |
| N21 Ni1 N22                                                                                  | 79.71(18) | N31 Ni1 N32 | 78.7(3) |
| N3 Ni1 O1                                                                                    | 87.15(17) | N3 Ni1 O71  | 87.9(3) |
| N6 Ni1 O1                                                                                    | 88.70(17) | N6 Ni1 O71  | 88.0(2) |
| N21 Ni1 O1                                                                                   | 87.64(17) | N31 Ni1 O71 | 89.0(3) |
| N22 Ni1 O1                                                                                   | 89.98(17) | N32 Ni1 O71 | 86.6(3) |
| N17 Ni2 N5                                                                                   | 93.62(19) | N17 Ni2 N5  | 93.2(3) |
| N5 Ni2 N41                                                                                   | 93.03(19) | N42 Ni2 N5  | 95.3(3) |
| N17 Ni2 N42                                                                                  | 92.94(19) | N17 Ni2 N41 | 91.8(3) |
| N41 Ni2 N42                                                                                  | 79.90(19) | N42 Ni2 N41 | 79.5(3) |
| N17 Ni2 O2                                                                                   | 94.46(19) | N17 Ni2 O82 | 93.8(3) |
| N5 Ni2 O2                                                                                    | 93.35(17) | N5 Ni2 O82  | 91.9(3) |
| N41 Ni2 O2                                                                                   | 89.83(19) | N42 Ni2 O82 | 88.1(3) |
| N42 Ni2 O2                                                                                   | 93.25(17) | N41 Ni2 O82 | 92.1(3) |
| N17 Ni2 O3                                                                                   | 89.53(19) | N17 Ni2 O81 | 90.6(3) |
| N5 Ni2 O3                                                                                    | 86.78(18) | N5 Ni2 O81  | 88.3(4) |
| N41 Ni2 O3                                                                                   | 86.16(19) | N42 Ni2 O81 | 87.5(3) |
| N42 Ni2 O3                                                                                   | 86.15(18) | N41 Ni2 O81 | 87.3(4) |
| N12 Ni3 N1                                                                                   | 95.89(18) | N12 Ni3 N1  | 93.4(2) |
| N12 Ni3 N62                                                                                  | 93.90(18) | N12 Ni3 N52 | 93.6(3) |
| N1 Ni3 N61                                                                                   | 91.16(18) | N1 Ni3 N51  | 93.9(2) |
| N62 Ni3 N61                                                                                  | 79.36(18) | N51 Ni3 N52 | 78.9(3) |
| N12 Ni3 O5                                                                                   | 90.49(18) | N12 Ni3 O92 | 90.0(3) |
| N1 Ni3 O5                                                                                    | 94.98(18) | N1 Ni3 O92  | 93.8(3) |
| N62 Ni3 O5                                                                                   | 92.98(18) | N52 Ni3 O92 | 92.1(3) |
| N61 Ni3 O5                                                                                   | 87.25(18) | N51 Ni3 O92 | 92.0(3) |
| N12 Ni3 O4                                                                                   | 87.97(18) | N12 Ni3 O91 | 88.7(3) |
| N1 Ni3 O4                                                                                    | 85.82(18) | N1 Ni3 O91  | 86.8(2) |
| N62 Ni3 O4                                                                                   | 86.49(18) | N52 Ni3 O91 | 87.5(3) |
| N61 Ni3 O4                                                                                   | 94.20(18) | N51 Ni3 O91 | 89.2(3) |
| N11 Ni4 N4                                                                                   | 95.98(19) | N4 Ni4 N11  | 93.9(3) |
| N4 Ni4 N82                                                                                   | 92.80(19) | N4 Ni4 N22  | 92.3(2) |
| N11 Ni4 N81                                                                                  | 91.16(19) | N11 Ni4 N21 | 94.9(3) |
| N82 Ni4 N81                                                                                  | 80.1(2)   | N22 Ni4 N21 | 78.9(3) |
| N4 Ni4 O6                                                                                    | 90.8(2)   | N4 Ni4 O62  | 92.3(3) |
| N11 Ni4 O6                                                                                   | 91.4(2)   | N11 Ni4 O62 | 91.1(3) |
| O6 Ni4 N82                                                                                   | 85.9(2)   | N22 Ni4 O62 | 84.1(3) |
| O6 Ni4 N81                                                                                   | 89.7(2)   | N21 Ni4 O62 | 88.1(3) |
| N11 Ni4 O7                                                                                   | 90.8(2)   | N4 Ni4 O61  | 89.9(3) |
| N4 Ni4 O7                                                                                    | 89.6(2)   | N11 Ni4 O61 | 91.1(3) |
| N82 Ni4 O7                                                                                   | 91.9(2)   | N22 Ni4 O61 | 93.5(3) |
| N81 Ni4 O7                                                                                   | 89.6(2)   | N21 Ni4 O61 | 89.4(3) |
